# Supplementary material for: Exocyclic self-assembly behavior of carboxylic acid and lariat ether macrocyclic hosts: regulation by pendent arm
Source: Royal Society of Chemistry journal article supplement (doi:10.1039/c5ra09521b), 2015-01-01
Supplement: c5ra09521b1.pdf [file c5ra09521b1.pdf]

## SUPPORTING INFORMATION OF

### EXOCYCLIC SELF-ASSEMBLY BEHAVIORS OF CARBOXYLIC ACID AND LARIAT ETHER MACROCYCLIC HOSTS: REGULATION BY PENDENT ARM

Rong Guo, Wei Wang, Weiping Yang, Yuanyin Chen and Shuling Gong\*

*College of Chemistry and Molecular Sciences, Wuhan University, Wuhan 430072, PR China. Fax: +86 27 68754067; Tel: +86 27 68752701; E-mail: gongsl@whu.edu.cn.*

Table S1: Torsion angles in the pendant arms of complexes **1**, **2**, **3** and complex **4**;

Table S2: Torsion angles in the pendant arms of salts **5**, **6** and **7**;

Table S3: Hydrogen bonds for complex **1**.

Table S4: Hydrogen bonds for complex **2**.

Table S5: Hydrogen bonds for complex **3**.

Table S6: Hydrogen bonds for complex **4**.

Table S7: Hydrogen bonds for complex **5**.

Table S8: Hydrogen bonds for complex **6**.

Table S9: Hydrogen bonds for complex **7**.

Table S10: Table S10a. The C-H... $\pi$  hydrogen bonds.

Table S10b. the  $\pi$ ... $\pi$  interactions.

Table S11: TGA and DSC for complex **2**.

Table S12: FT-IR for compound **II** and complexes **1**, **2**, **3**, **4**. (Figure S1: Sample prepared by "Cast film" method- sample first dissolved in acetone, a drop of this solution is deposited on surface of KBr cell, the solution is then evaporated to dryness and the film formed on the cell is analysed directly. Figure S2: KBr discs (sample 2 mg in 20 mg of KBr) were prepared. )

Table S1: Torsion angles in the pendant arms of complexes **1**, **2**, **3** and complex **4**;

| Structure No.  | <b>1</b>    | <b>2</b>  | <b>3</b>    | <b>4</b>  |
|----------------|-------------|-----------|-------------|-----------|
| C5-O3-C11-C12  | 177.93(18)  | 177.7(2)  | -177.77(18) | -177.1(2) |
| O3-C11-C12-N1  | -171.34(17) | -165.1(2) | 169.50(18)  | 169.3(3)  |
| C11-C12-N1-C13 | -141.73(19) | -145.2(2) | 143.7(2)    | 142.6(3)  |
| C11-C12-N1-C15 | 89.3(2)     | 83.9(2)   | -86.7(2)    | -88.8(3)  |
| C12-N1-C13-C14 | -77.2(2)    | -75.8(3)  | 75.8(3)     | 75.0(3)   |
| N1-C13-C14-O4  | 53.4(3)     | 50.8(3)   | -52.6(3)    | -52.8(3)  |
| C13-C14-O4-C6# | 169.00(18)  | 169.5(2)  | -169.38(19) | -169.8(2) |

|                 |             |            |           |          |
|-----------------|-------------|------------|-----------|----------|
| C12–Ni–C15–C16  | -177.12(19) | -171.6(4)  | 168.5(2)  | 177.5(2) |
| C14–C13–Ni–C15  | 50.4(3)     | 51.9(3)    | -51.5(3)  | -52.2(2) |
| C13–Ni–C15–C16  | 54.8(2)     | 59.1(4)    | -63.5(3)  | -54.5(3) |
| Ni–C15–C16–C17  | 175.2(2)    |            |           | 128.9(4) |
| C15–C16–C17–C18 | 173.5(3)    |            |           |          |
| Ni–C15–C16–O5   |             | -83.6(7)   | 79.1(3)   |          |
| C15–C16–O5–C17  |             | -177.7(16) | -168.0(2) |          |
| C16–O5–C17–C18  |             |            | -175.6(2) |          |

Table S2: Torsion angles in the pendant arms of salts **5**, **6** and **7**;

|                    | <b>5</b>      | <b>6</b>  | <b>7</b>  |                    | <b>5</b>  | <b>6</b>  | <b>7</b>  |
|--------------------|---------------|-----------|-----------|--------------------|-----------|-----------|-----------|
| O1A–C1A–C2A–C3A    | -<br>178.0(3) | -177.8(5) | 179.6(5)  | C12A–C7A–O3A–C16A  | 2.9(5)    | -3.4(9)   | -10.5(7)  |
| O1A–C1A–C6A–C5A    | 178.5(3)      | 179.3(6)  | -179.5(6) | C12A–C7A–C8A–O4A   | 179.3(3)  | -179.5(5) | -177.9(4) |
| C6A–C1A–O1A–C13A   | 4.2(5)        | -4.0(9)   | 0.0(8)    | C8A–C7A–C12A–C11A  | -2.5(6)   | 0.5(9)    | -0.6(8)   |
| C6A–C1A–C2A–O5A    | -178.3(3)     | -177.9(5) | -178.8(5) | O4A–C8A–C9A–C10A   | -177.6(4) | 178.4(6)  | 178.4(5)  |
| C2A–C1A–C6A–C5A    | -2.3(5)       | 0.1(9)    | 0.1(10)   | C9A–C10A–C11A–C12A | -0.8(8)   | -1.5(10)  | 1.8(9)    |
| O1A–C1A–C2A–O5A    | 1.0(4)        | 2.8(8)    | 0.8(8)    | O1A–C13A–C14A–O2A  | -60.8(4)  | -66.7(6)  | -72.1(6)  |
| C6A–C1A–C2A–C3A    | 2.7(5)        | 1.5(9)    | 0.0(9)    | O2A–C15A–C16A–O3A  | 70.9(4)   | 71.5(6)   | 63.4(6)   |
| C1A–C2A–O5A–C20A   | 169.6(3)      | 175.9(5)  | 174.0(5)  | O4A–C17A–C18A–NiA  | -61.0(4)  | -66.5(6)  | 52.0(5)   |
| C3A–C2A–O5A–C20A   | -11.5(5)      | -3.5(9)   | -4.8(8)   | C20A–C19A–NiA–C18A | -174.0(3) | -180.0(4) | 58.6(6)   |
| C2A–C3A–C4A–C5A    | -0.1(5)       | -0.1(9)   | 1.0(12)   | C19A–C20A–O5A–C2A  | -174.3(3) | -172.9(5) | -175.8(4) |
| C8A–C7A–O3A–C16A   | -<br>176.6(3) | 177.4(5)  | 170.2(4)  | C1A–C2A–C3A–C4A    | -1.5(5)   | -1.5(9)   | -0.6(10)  |
| O3A–C7A–C8A–C9A    | -179.3(3)     | 178.7(5)  | -178.8(4) | C4A–C5A–C6A–C1A    | 0.7(6)    | -1.7(9)   | 0.4(12)   |
| O3A–C7A–C12A–C11A  | 178.0(4)      | -178.7(6) | -179.9(5) | O3A–C7A–C8A–O4A    | -1.1(4)   | -0.3(8)   | 1.4(6)    |
| C9A–C8A–O4A–C17A   | 3.4(5)        | 4.5(9)    | -9.3(7)   | C12A–C7A–C8A–C9A   | 1.2(5)    | -0.6(9)   | 1.9(7)    |
| C8A–C9A–C10A–C11A  | -0.6(7)       | 1.4(9)    | -0.5(8)   | C7A–C8A–O4A–C17A   | -174.7(3) | -176.7(5) | 170.5(4)  |
| C14A–C13A–O1A–C1A  | -177.6(3)     | -168.6(5) | 175.1(5)  | C7A–C8A–C9A–C10A   | 0.4(6)    | -0.3(9)   | -1.4(8)   |
| C16A–C15A–O2A–C14A | -175.7(3)     | 173.9(5)  | -178.1(5) | C10A–C11A–C12A–C7A | 2.3(7)    | 0.6(9)    | -1.3(8)   |
| C18A–C17A–O4A–C8A  | 176.1(3)      | -175.2(5) | -178.6(4) | C13A–C14A–O2A–C15A | 178.7(3)  | 174.8(5)  | 168.8(5)  |
| C17A–C18A–NiA–C21A | -<br>167.0(3) | -63.8(6)  | 44.5(6)   | C15A–C16A–O3A–C7A  | -175.6(3) | 176.1(5)  | 177.9(4)  |
| NiA–C19A–C20A–O5A  | -55.1(4)      | 62.7(6)   | 58.7(6)   | C17A–C18A–NiA–C19A | -41.0(4)  | 171.1(4)  | 173.4(4)  |
| C22A–C21A–NiA–C19A | 175.1(7)      | -97.7(5)  | -65.4(5)  | C20A–C19A–NiA–C21A | -48.5(4)  | 55.3(6)   | -171.3(4) |

|                     |          |           |           |                    |          |          |         |
|---------------------|----------|-----------|-----------|--------------------|----------|----------|---------|
| O5A-C2A-C3A-C4A     | 179.6(3) | 177.8(6)  | 178.2(7)  | C22A-C21A-NiA-C18A | -58.6(8) | 140.0(4) | 64.0(5) |
| C21A-C22A-C23A-C24A | 62.4(13) |           | -178.5(5) |                    |          |          |         |
| NiA-C21A-C22A-C23A  | 177.3(7) |           | -176.9(4) |                    |          |          |         |
| C22A-C23A-C24A-C25A |          |           | 179.7(5)  |                    |          |          |         |
| C21A-C22A-O6A-C23A  |          | 167.2(5)  |           |                    |          |          |         |
| C23A-C24A-C25A-C26A |          | -172.3(7) |           |                    |          |          |         |
| C24A-C23A-O6A-C22A  |          | -176.3(5) |           |                    |          |          |         |
| O6A-C23A-C24A-C25A  |          | -64.6(8)  |           |                    |          |          |         |

Table S3: Hydrogen bonds for complex **1** [Å and °].

| D-H...A               | d(D-H)    | d(H...A) | d(D...A) | <(DHA) |
|-----------------------|-----------|----------|----------|--------|
| O(1)-H(1)...N(1)      | 0.871(19) | 1.77(2)  | 2.631(2) | 172(5) |
| C(11)-H(11A)...O(2)#3 | 0.99      | 2.40     | 3.373(3) | 168.8  |
| C(13)-H(13A)...O(2)   | 0.99      | 2.56     | 3.311(3) | 132.4  |
| C(15)-H(15B)...O(2)#3 | 0.99      | 2.47     | 3.458(3) | 172.3  |
| C(16)-H(16D)...O(2)   | 0.99      | 2.63     | 3.407(3) | 135.7  |
| C(13)-H(13B)...O(3)#4 | 0.99      | 2.62     | 3.490(3) | 146.8  |
| C(12)-H(12B)...O(4)#5 | 0.99      | 2.64     | 3.558(3) | 154.3  |

Symmetry transformations used to generate equivalent atoms:

#1 -x+1,-y,-z+1    #2 -x+1/2,-y+3/2,-z+1    #3 x,y+1,z

#4 x,y-1,z    #5 -x+1/2,-y+1/2,-z+1

Table S4: Hydrogen bonds for complex **2** [Å and °].

| D-H...A               | d(D-H)  | d(H...A) | d(D...A) | <(DHA) |
|-----------------------|---------|----------|----------|--------|
| O(1)-H(1A)...N(1)     | 0.87(2) | 1.74(2)  | 2.584(3) | 164(5) |
| O(6)-H(6A)...O(2)     | 0.86    | 2.16     | 2.987(8) | 161.9  |
| C(13)-H(13A)...O(2)   | 0.99    | 2.46     | 3.198(3) | 131.3  |
| C(17)-H(17C)...O(6)   | 0.98    | 2.64     | 3.62(2)  | 175.4  |
| C(14)-H(14B)...O(5)   | 0.99    | 2.44     | 3.180(6) | 131.2  |
| C(11)-H(11A)...O(2)#3 | 0.99    | 2.57     | 3.549(3) | 170.7  |
| C(15)-H(15B)...O(2)#3 | 0.99    | 2.40     | 3.352(3) | 160.5  |
| C(12)-H(12B)...O(4)#4 | 0.99    | 2.62     | 3.584(3) | 164.0  |
| C(13)-H(13B)...O(3)#5 | 0.99    | 2.70     | 3.646(3) | 159.7  |

C(16)-H(16B)...O(6)#3 0.99 2.32 3.178(18) 144.2

Symmetry transformations used to generate equivalent atoms:

#1 -x,-y+1,-z+2 #2 -x+1/2,-y+5/2,-z+2 #3 x,y+1,z

#4 -x+1/2,-y+3/2,-z+2 #5 x,y-1,z

Table S5: Hydrogen bonds for complex **3** [Å and °].

| D-H...A               | d(D-H)  | d(H...A) | d(D...A) | <(DHA) |
|-----------------------|---------|----------|----------|--------|
| O(1)-H(1B)...N(1)     | 0.90(6) | 1.71(6)  | 2.611(3) | 176(5) |
| C(13)-H(13A)...O(2)   | 0.99    | 2.49     | 3.245(3) | 133.2  |
| C(16)-H(16A)...O(2)   | 0.99    | 2.58     | 3.379(3) | 137.9  |
| C(14)-H(14B)...O(5)   | 0.99    | 2.47     | 3.150(3) | 125.8  |
| C(11)-H(11A)...O(2)#3 | 0.99    | 2.48     | 3.456(3) | 168.8  |
| C(15)-H(15B)...O(2)#3 | 0.99    | 2.36     | 3.312(3) | 161.3  |
| C(12)-H(12B)...O(4)#4 | 0.99    | 2.61     | 3.541(3) | 156.9  |
| C(13)-H(13B)...O(3)#5 | 0.99    | 2.64     | 3.550(3) | 152.2  |
| C(9)-H(9)...O(5)#6    | 0.95    | 2.62     | 3.478(3) | 150.5  |

Symmetry transformations used to generate equivalent atoms:

#1 -x+1,-y+1,-z+2 #2 -x+2,-y,-z+1 #3 x+1,y,z

#4 -x+1,-y,-z+1 #5 x-1,y,z #6 x+1,y+1,z

Table S6: Hydrogen bonds for complex **4** [Å and °].

| D-H...A               | d(D-H)  | d(H...A) | d(D...A) | <(DHA) |
|-----------------------|---------|----------|----------|--------|
| O(1)-H(1)...N(1)      | 0.87(4) | 1.75(4)  | 2.621(3) | 177(4) |
| C(13)-H(13A)...O(2)   | 0.99    | 2.54     | 3.263(4) | 129.9  |
| C(16)-H(16)...O(2)    | 0.95    | 2.80     | 3.518(4) | 133.5  |
| C(11)-H(11A)...O(2)#3 | 0.99    | 2.41     | 3.391(4) | 170.4  |
| C(15)-H(15B)...O(2)#3 | 0.99    | 2.56     | 3.543(4) | 169.9  |
| C(12)-H(12B)...O(4)#4 | 0.99    | 2.66     | 3.600(4) | 157.8  |
| C(13)-H(13B)...O(3)#5 | 0.99    | 2.62     | 3.536(4) | 153.1  |

Symmetry transformations used to generate equivalent atoms:

#1 -x+1,-y+2,-z #2 -x+1/2,-y+1/2,-z #3 x,y-1,z

#4 -x+1/2,-y+3/2,-z #5 x,y+1,z

Table S7. Hydrogen bonds for **5** [Å and °].

| D-H...A | d(D-H) | d(H...A) | d(D...A) | <(DHA) |
|---------|--------|----------|----------|--------|
|---------|--------|----------|----------|--------|

---

Water in the cavity of the crown – crown ether

|                        |           |           |          |        |
|------------------------|-----------|-----------|----------|--------|
| N(1A)-H(1A)...O(10)#1  | 0.879(18) | 1.890(19) | 2.763(4) | 172(3) |
| N(1B)-H(1B)...O(15)    | 0.890(16) | 1.804(17) | 2.689(4) | 173(3) |
| N(1C)-H(1C)...O(11)    | 0.898(17) | 1.848(18) | 2.736(3) | 169(3) |
| O(10)-H(10D)...O(1A)#1 | 0.841(17) | 2.174(17) | 3.008(3) | 171(3) |
| O(10)-H(10D)...O(1A)#1 | 0.841(17) | 2.174(17) | 3.008(3) | 171(3) |
| O(10)-H(10D)...O(2A)#1 | 0.841(17) | 2.67(3)   | 3.066(3) | 110(3) |
| O(10)-H(10C)...O(3A)#1 | 0.831(17) | 2.14(2)   | 2.958(3) | 167(3) |
| O(10)-H(10C)...O(4A)#1 | 0.831(17) | 2.46(3)   | 2.985(3) | 122(3) |
| O(10)-H(10D)...O(5A)#1 | 0.841(17) | 2.53(3)   | 3.042(4) | 120(3) |
| O(11)-H(11D)...O(1C)   | 0.831(16) | 2.124(18) | 2.938(3) | 167(3) |
| O(11)-H(11C)...O(2C)   | 0.837(16) | 2.71(3)   | 3.080(3) | 108(2) |
| O(11)-H(11C)...O(3C)   | 0.837(16) | 2.085(17) | 2.915(3) | 171(3) |
| O(11)-H(11C)...O(4C)   | 0.837(16) | 2.50(3)   | 2.978(3) | 117(3) |
| O(11)-H(11D)...O(5C)   | 0.831(16) | 2.43(3)   | 2.971(4) | 124(3) |
| O(15)-H(15D)...O(1B)   | 0.829(16) | 2.149(17) | 2.959(3) | 166(3) |
| O(15)-H(15D)...O(2B)   | 0.829(16) | 2.55(3)   | 2.948(3) | 110(2) |
| O(15)-H(15C)...O(3B)   | 0.849(17) | 2.061(17) | 2.902(3) | 171(2) |
| O(15)-H(15C)...O(4B)   | 0.849(17) | 2.47(2)   | 2.981(3) | 120(2) |
| O(15)-H(15D)...O(5B)   | 0.829(16) | 2.55(3)   | 3.048(3) | 120(3) |

Interactions in the hydrated anion layer

|                        |           |           |          |        |
|------------------------|-----------|-----------|----------|--------|
| O(12)-H(12C)...O(14)#2 | 0.828(16) | 1.940(17) | 2.767(3) | 177(4) |
| O(13)-H(13C)...O(19)   | 0.815(17) | 1.826(17) | 2.637(4) | 173(3) |
| O(14)-H(14D)...O(18)   | 0.830(16) | 1.940(19) | 2.728(4) | 158(3) |
| O(17)-H(17C)...O(16)   | 0.820(18) | 1.832(19) | 2.650(4) | 177(4) |
| O(12)-H(12D)...O(7C)   | 0.846(17) | 1.898(19) | 2.735(3) | 170(3) |
| O(13)-H(13D)...O(6C)#3 | 0.802(16) | 1.975(16) | 2.771(3) | 171(3) |
| O(14)-H(14C)...O(7C)#4 | 0.838(17) | 2.014(19) | 2.839(3) | 168(3) |
| O(16)-H(16C)...O(8B)   | 0.847(17) | 1.909(18) | 2.736(4) | 165(3) |
| O(16)-H(16D)...O(8B)#5 | 0.862(17) | 2.53(3)   | 3.090(3) | 124(3) |
| O(16)-H(16D)...O(9B)#5 | 0.862(17) | 1.953(17) | 2.813(3) | 175(3) |
| O(17)-H(17D)...O(6A)#6 | 0.827(18) | 1.87(2)   | 2.673(4) | 163(4) |
| O(18)-H(18C)...O(6C)#4 | 0.854(17) | 1.945(18) | 2.788(4) | 169(3) |
| O(18)-H(18D)...O(7A)#7 | 0.855(18) | 1.80(2)   | 2.638(5) | 168(5) |
| O(19)-H(19C)...O(9B)#5 | 0.811(18) | 1.96(2)   | 2.774(4) | 176(5) |
| O(19)-H(19D)...O(6A)#6 | 0.812(18) | 2.13(2)   | 2.935(4) | 173(5) |
| O(19)-H(19D)...O(7A)#6 | 0.812(18) | 2.50(3)   | 3.083(4) | 129(4) |
| O(9A)-H(9AB)...O(17)   | 0.828(18) | 1.741(19) | 2.559(3) | 169(4) |
| O(7B)-H(7BA)...O(12)   | 0.833(18) | 1.82(2)   | 2.631(4) | 164(4) |
| O(8C)-H(8CA)...O(13)#5 | 0.850(18) | 1.729(19) | 2.576(3) | 174(4) |

Hydrogen bond between crown ether and acid anions

|                        |      |      |          |       |
|------------------------|------|------|----------|-------|
| C(3A)-H(3AA)...O(8B)   | 0.95 | 2.52 | 3.464(4) | 173.3 |
| C(9A)-H(9AA)...O(8A)#5 | 0.95 | 2.64 | 3.585(5) | 170.5 |

|                                                                     |      |      |          |       |
|---------------------------------------------------------------------|------|------|----------|-------|
| C(14B)-H(14A)...O(8C)                                               | 0.99 | 2.56 | 3.481(4) | 155.1 |
| C(19B)-H(19A)...O(6C)#7                                             | 0.99 | 2.64 | 3.351(4) | 128.5 |
| C(19B)-H(19A)...O(7C)#7                                             | 0.99 | 2.43 | 3.299(4) | 146.5 |
| C(21A)-H(21G)...O(6A)#8                                             | 0.99 | 2.61 | 3.470(5) | 145.4 |
| C(21D)-H(21I)...O(6A)#8                                             | 0.99 | 2.53 | 3.470(5) | 158.7 |
| Hydrogen bond between crown ether and water in hydrated anion layer |      |      |          |       |
| C(17B)-H(17B)...O(18)#9                                             | 0.99 | 2.59 | 3.577(5) | 173.0 |

Symmetry transformations used to generate equivalent atoms:

|                   |                 |            |                 |
|-------------------|-----------------|------------|-----------------|
| #1 -x+1,-y+1,-z+1 | #2 x-1,y,z      | #3 x,y,z+1 | #4 -x+1,-y+1,-z |
| #5 -x+1,-y,-z+1   | #6 -x,-y+1,-z+1 | #7 x+1,y,z |                 |
| #8 x+1,y-1,z      | #9 -x+2,-y+1,-z |            |                 |

Table S8 Hydrogen bonds for **6** [Å and °].

| Donor--H...Acceptor                       | [ ARU ]    | D - H   | H...A   | H...A    | D - H...A |
|-------------------------------------------|------------|---------|---------|----------|-----------|
| Hydrogen bond in cation sheet             |            |         |         |          |           |
| N1A--H1A..O5A                             | [ ]        | 0.88(4) | 2.57(6) | 2.917(5) | 104(3)    |
| N1A--H1A..O6A                             | [ ]        | 0.88(4) | 2.46(6) | 2.873(6) | 109(5)'   |
| N1A--H1A..O7A                             | [ 1556.05] | 0.88(3) | 1.92(4) | 2.699(6) | 146(6)''  |
| N1B--H1B..O5B                             | [ ]        | 0.88(3) | 2.59(6) | 2.948(5) | 106(3)    |
| N1B--H1B..O6B                             | [ ]        | 0.88(3) | 2.50(4) | 2.894(6) | 108(4)'   |
| N1B--H1B..O7B                             | [ 1555.06] | 0.88(3) | 1.89(4) | 2.674(6) | 148(4)''  |
| O7A--H7AA..O1A                            | [ 1554.01] | 0.83(3) | 2.19(3) | 3.016(5) | 175(7)    |
| O7A--H7AA..O2A                            | [ 1554.01] | 0.83(3) | 2.57(7) | 2.993(6) | 113(5)'   |
| O7A--H7AA..O5A                            | [ 1554.01] | 0.83(3) | 2.49(7) | 2.864(5) | 108(6)''  |
| O7A--H7AB..O3A                            | [ 1554.01] | 0.80(5) | 2.14(5) | 2.920(6) | 163(5)    |
| O7A--H7AB..O4A                            | [ 1554.01] | 0.80(5) | 2.34(4) | 2.858(5) | 123(4)'   |
| O7B--H7BA..O3B                            | [ 1555.02] | 0.81(5) | 2.07(4) | 2.876(5) | 170(6)    |
| O7B--H7BA..O4B                            | [ 1555.02] | 0.81(5) | 2.42(4) | 2.869(5) | 116(4)'   |
| O7B--H7BB..O1B                            | [ 1555.02] | 0.80(4) | 2.23(3) | 3.013(5) | 167(5)    |
| O7B--H7BB..O5B                            | [ 1555.02] | 0.80(4) | 2.34(4) | 2.808(5) | 118(4)'   |
| Hydrogen bond in anion layer (acid-acid)  |            |         |         |          |           |
| O11A--H11C..O8A                           | [ 4755.03] | 0.83(3) | 1.70(3) | 2.510(5) | 166(7)    |
| O11B--H11D..O8B                           | [ 4655.04] | .85     | 1.61    | 2.450(5) | 172       |
| O11B--H11D..O9B                           | [ 4655.04] | 0.85    | 2.5     | 3.083(6) | 127'      |
| Hydrogen bond in anion layer (water-acid) |            |         |         |          |           |
| O12--H12F..O8A                            | [ 1455.03] | 0.84(4) | 1.98(4) | 2.806(7) | 170(4)    |
| O13--H13E..O9A                            | [ 1555.03] | 0.86(4) | 1.91(5) | 2.752(7) | 166(7)    |
| O13--H13F..O9B                            | [ 1555.04] | 0.83(3) | 1.95(3) | 2.716(7) | 153(6)    |
| O14--H14F ..O11B                          | [ 4645.04] | 0.84(4) | 2.06(3) | 2.878(8) | 168(8)    |
| O15--H15E ..O10A                          | [ 1555.03] | 0.84(6) | 2.23(6) | 2.920(8) | 140(5)    |
| O15--H15E..O10B                           | [ 1555.04] | 0.84(6) | 2.59(6) | 3.081(7) | 119(5)'   |
| O15--H15F..O8B                            | [ 4655.04] | 0.84(4) | 2.01(3) | 2.847(8) | 174(10)   |

|                                      |            |         |         |           |        |
|--------------------------------------|------------|---------|---------|-----------|--------|
| O16--H16E..O14                       | [ 1555.09] | 0.85(6) | 1.91(6) | 2.708(8)  | 158(5) |
| O16--H16F..O12                       | [ 4645.07] | 0.84(4) | 2.02(6) | 2.787(7)  | 152(6) |
| O17--H17E..O16                       | [ 1555.11] | 0.85(7) | 2.18(8) | 2.934(9)  | 149(9) |
| O17--H17F..O13                       | [ 1555.08] | 0.83(8) | 1.98(8) | 2.799(10) | 170(7) |
| Weak Hydrogen bond between ion pairs |            |         |         |           |        |
| C15B--H15D..O9B                      | [ 4656.04] | 0.99    | 2.56    | 3.396(9)  | 142    |
| C18A--H18A..O16                      | [ 2655.11] | 0.99    | 2.34    | 3.206(8)  | 146    |
| C20A--H20A..O10B                     | [ 2665.04] | 0.99    | 2.47    | 3.263(7)  | 136    |
| C20A--H20B..O10A                     | [ 2665.03] | 0.99    | 2.53    | 3.456(7)  | 157    |
| C29A--H29B..O10B                     | [ 1555.04] | 0.95    | 2.56    | 3.494(8)  | 169    |
| intraC22B--H22D..O5B                 | [ ]        | 0.99    | 2.54    | 3.341(7)  | 138    |
| intraC28A--H28B..O9A                 | [ ]        | 0.95    | 2.4     | 2.734(7)  | 100    |

---

Translation of ARU-Code to CIF and Equivalent Position Code

|                                        |
|----------------------------------------|
| [ 1556.] = [ 1_556] = x,y,1+z          |
| [ 2665.] = [ 2_665] = 3/2-x,1-y,1/2+z  |
| [ 2655.] = [ 2_655] = 3/2-x,-y,1/2+z   |
| [ 4656.] = [ 3_656] = 1-x,1/2+y,3/2-z  |
| [ 1554.] = [ 1_554] = x,y,-1+z         |
| [ 4755.] = [ 3_755] = 2-x,1/2+y,1/2-z  |
| [ 4645.] = [ 3_645] = 1-x,-1/2+y,1/2-z |
| [ 4655.] = [ 3_655] = 1-x,1/2+y,1/2-z  |
| [ 1455.] = [ 1_455] = -1+x,y,z         |

**Table S9** Hydrogen bonds for 7 [Å and °].

| D-H...A                                        | d(D-H)    | d(H...A)  | d(D...A) | <(DHA) |
|------------------------------------------------|-----------|-----------|----------|--------|
| Water in the cavity of the crown – crown ether |           |           |          |        |
| N(1A)-H(1A)...O(6A)                            | 0.873(19) | 1.84(2)   | 2.682(5) | 162(4) |
| N(1B)-H(1B)...O(6B)                            | 0.868(19) | 1.84(3)   | 2.662(5) | 158(4) |
| N(1C)-H(1C)...O(6C)#2                          | 0.868(18) | 1.84(2)   | 2.672(5) | 160(4) |
| O(6A)-H(6AB)...O(1A)                           | 0.827(18) | 2.06(2)   | 2.868(5) | 166(5) |
| O(6A)-H(6AB)...O(2A)                           | 0.827(18) | 2.65(5)   | 2.954(5) | 103(4) |
| O(6A)-H(6AC)...O(3A)                           | 0.797(19) | 2.05(2)   | 2.832(5) | 169(5) |
| O(6A)-H(6AC)...O(4A)                           | 0.797(19) | 2.56(4)   | 3.040(5) | 120(4) |
| O(6A)-H(6AB)...O(5A)                           | 0.827(18) | 2.49(4)   | 2.943(5) | 116(4) |
| O(6B)-H(6BB)...O(1B)                           | 0.811(18) | 2.07(2)   | 2.863(5) | 168(5) |
| O(6B)-H(6BB)...O(2B)                           | 0.811(18) | 2.69(5)   | 3.012(5) | 106(4) |
| O(6B)-H(6BC)...O(3B)                           | 0.823(19) | 2.03(2)   | 2.822(5) | 163(5) |
| O(6B)-H(6BC)...O(4B)                           | 0.823(19) | 2.44(4)   | 3.001(5) | 126(4) |
| O(6B)-H(6BB)...O(5B)                           | 0.811(18) | 2.49(4)   | 2.910(5) | 114(4) |
| O(6C)-H(6CC)...O(1C)#3                         | 0.812(18) | 1.996(19) | 2.797(5) | 168(3) |

|                        |           |         |          |        |
|------------------------|-----------|---------|----------|--------|
| O(6C)-H(6CB)...O(2C)#3 | 0.816(18) | 2.69(5) | 2.975(5) | 102(4) |
| O(6C)-H(6CB)...O(3C)#3 | 0.816(18) | 2.08(2) | 2.879(5) | 168(5) |
| O(6C)-H(6CB)...O(4C)#3 | 0.816(18) | 2.43(4) | 2.891(5) | 117(4) |
| O(6C)-H(6CC)...O(5C)#3 | 0.812(18) | 2.52(3) | 3.023(5) | 121(3) |

Interactions in the hydrated anion layer

|                        |           |           |          |           |        |
|------------------------|-----------|-----------|----------|-----------|--------|
| O(13)-H(13G)...O(20)   | 0.844(19) | 1.98(3)   | 2.775(6) | 157(5)    |        |
| O(16)-H(16G)...O(17)   | 0.816(18) | 2.02(2)   | 2.795(6) | 159(4)    |        |
| O(18)-H(18G)...O(19)   | 0.824(19) | 1.98(3)   | 2.737(5) | 153(5)    |        |
| O(19)-H(19G)...O(16)#4 | 0.835(19) | 1.95(2)   | 2.762(5) | 165(6)    |        |
| O(20)-H(20G)...O(18)   | 0.832(19) | 1.91(2)   | 2.700(6) | 158(5)    |        |
| O(20)-H(20H)...O(14)   | 0.836(19) | 1.89(2)   | 2.712(6) | 167(5)    |        |
| O(21)-H(21G)...O(22)#5 | 0.825(19) | 1.99(2)   | 2.804(6) | 168(6)    |        |
| O(21)-H(21H)...O(26)#5 | 0.826(19) | 1.973(19) | 2.792(6) | 171(5)    |        |
| O(22)-H(22G)...O(13)   | 0.849(19) | 2.05(3)   | 2.870(6) | 163(5)    |        |
| O(22)-H(22H)...O(25)   | 0.849(19) | 1.99(3)   | 2.755(8) | 150(6)    |        |
| O(25)-H(25G)...O(27)   | 0.84(2)   |           | 1.90(4)  | 2.702(7)  | 159(9) |
| O(25)-H(25H)...O(15)   | 0.83(2)   |           | 1.96(2)  | 2.788(7)  | 173(6) |
| O(27)-H(27G)...O(24)   | 0.85      |           | 1.77     | 2.621(7)  | 178.2  |
| O(23)-H(23K)...O(21)#5 | 0.85      |           | 1.91     | 2.760(9)  | 178.8  |
| O(23)-H(23L)...O(29)#6 | 0.85      |           | 1.93     | 2.777(11) | 178.6  |
| O(13)-H(13H)...O(7)    | 0.821(19) |           | 2.05(3)  | 2.850(6)  | 163(5) |
| O(14)-H(14G)...O(7)    | 0.830(19) |           | 1.90(2)  | 2.702(5)  | 163(5) |
| O(14)-H(14H)...O(11)   | 0.829(19) |           | 1.91(3)  | 2.710(5)  | 161(5) |
| O(15)-H(15G)...O(9)#4  | 0.826(19) | 1.99(2)   | 2.810(6) | 173(6)    |        |
| O(16)-H(16H)...O(12)   | 0.811(19) | 2.05(3)   | 2.823(5) | 159(5)    |        |
| O(17)-H(17G)...O(8)    | 0.841(19) | 1.899(19) | 2.723(6) | 166(5)    |        |
| O(17)-H(17H)...O(11)   | 0.847(19) | 1.90(2)   | 2.733(5) | 169(5)    |        |
| O(19)-H(19H)...O(12)#1 | 0.824(19) | 1.92(2)   | 2.739(5) | 170(5)    |        |
| O(24)-H(24G)...O(8)#4  | 0.83(2)   |           | 1.97(2)  | 2.791(7)  | 174(7) |
| O(26)-H(26G)...O(10)   | 0.85      |           | 1.87     | 2.723(7)  | 177.8  |
| O(28)-H(28D)...O(9)    | 0.85      |           | 1.84     | 2.683(11) | 171.5  |
| O(28)-H(28D)...O(9)    | 0.85      |           | 1.84     | 2.683(11) | 171.5  |
| O(29)-H(29G)...O(10)   | 0.85      |           | 1.93     | 2.762(8)  | 164.9  |

Water in anion layer... crown

|                        |           |         |          |        |
|------------------------|-----------|---------|----------|--------|
| O(18)-H(18H)...O(2A)#4 | 0.806(19) | 2.12(2) | 2.918(5) | 170(6) |
| O(24)-H(24H)...O(2B)#2 | 0.834(19) | 2.35(4) | 3.067(6) | 145(6) |
| O(29)-H(29H)...O(2C)#7 | 0.85      | 2.18    | 3.009(7) | 165.3  |

Crown ... water in anion layer

|                         |      |      |          |          |       |
|-------------------------|------|------|----------|----------|-------|
| C(3C)-H(3CA)...O(29)#5  | 0.95 | 2.65 | 3.593(8) | 171.1    |       |
| C(13A)-H(13B)...O(16)   | 0.99 |      | 2.65     | 3.373(7) | 130.5 |
| C(19A)-H(19A)...O(14)#3 | 0.99 | 2.43 | 3.332(6) | 150.9    |       |
| C(13B)-H(13D)...O(27)#3 | 0.99 | 2.39 | 3.358(8) | 166.7    |       |
| C(16B)-H(16C)...O(17)#8 | 0.99 | 2.53 | 3.480(7) | 160.7    |       |
| C(13C)-H(13F)...O(29)#9 | 0.99 | 2.55 | 3.356(8) | 138.7    |       |



|                             |      |      |          |       |
|-----------------------------|------|------|----------|-------|
| C(15C)-H(15F)...O(29)#1     | 0.99 | 2.41 | 3.343(8) | 156.9 |
| C(16C)-H(16E)...O(26)#9     | 0.99 | 2.45 | 3.408(7) | 161.5 |
| C(17C)-H(17F)...O(15)#10    | 0.99 | 2.55 | 3.529(7) | 171.0 |
| C(20C)-H(20E)...O(29)#5     | 0.99 | 2.50 | 3.171(7) | 124.4 |
| Crown ... acid              |      |      |          |       |
| C(18B)-H(18C)...O(7)        | 0.99 | 2.63 | 3.546(6) | 154.4 |
| C(20A)-H(20B)...O(11)#3     | 0.99 | 2.57 | 3.473(6) | 150.9 |
| Crown ... crown             |      |      |          |       |
| C(19A)-H(19B)...O(5B)       | 0.99 | 2.54 | 3.501(6) | 164.6 |
| C(21A)-H(21A)...O(4A)       | 0.99 | 2.57 | 3.155(6) | 118.0 |
| C(19B)-H(19D)...O(5A)       | 0.99 | 2.61 | 3.567(6) | 161.9 |
| Intra C(21B)-H(21D)...O(4B) | 0.99 | 2.61 | 3.187(6) | 116.9 |
| C(18C)-H(18F)...O(3C)#11    | 0.99 | 2.49 | 3.281(6) | 136.8 |
| C(18C)-H(18F)...O(4C)#11    | 0.99 | 2.65 | 3.605(6) | 162.5 |
| Intra C(21C)-H(21E)...O(5C) | 0.99 | 2.59 | 3.155(6) | 116.4 |

Symmetry transformations used to generate equivalent atoms:

#1 -x,-y+1,-z+1    #2 x-1,y,z    #3 x+1,y,z    #4 x,y-1,z  
 #5 -x+1,-y+1,-z+1    #6 -x+1,-y+1,-z    #7 x+1,y,z-1  
 #8 x+1,y-1,z    #9 x-1,y,z+1    #10 x,y,z+1    #11 -x,-y,-z+2

Table S10a: The C-H... $\pi$  hydrogen bonds for complexes **1**, **2**, **3**, **4**, **5**, **6** and **7**.

| C-H... $\pi$ | H...Cg                   | H-Perp    | X-H...Cg   | X...Cg       | X-H,Pi     |    |
|--------------|--------------------------|-----------|------------|--------------|------------|----|
| Complex I    | C7-H7B...Cg(crown)       | 2.65      | 2.64       | 140          | 3.468(3)   | 49 |
| Complex III  | C10-H19B...Cg(crown)     | 2.79      | 2.785      | 138          | 3.576      | 48 |
| Complex 1    | C(7)-H(7)...Cg(crown)    | 2.93      | 2.85       | 146          | 3.751(3)   | 63 |
|              | C(18)-H(18D)...Cg(PTA)   | 3.2388(3) | 3.0779     | 119.345(224) | 3.8154(39) |    |
| Complex 2    | C(7)-H(7)...Cg(crown)    | 2.81      | 2.77       | 144          | 3.626(3)   | 59 |
|              | C(17)-H(17A)...Cg(PTA)   | 2.87      | 2.83       | 126          | 3.532(9)   | 28 |
| Complex 3    | C(18)-H(18C)...Cg(crown) | 3.114     | 3.0905     | 133.055(180) | 3.8500     |    |
| Complex 4    | C(7)-H(7)...Cg(crown)    | 2.73      | 2.69       | 144          | 3.542(3)   | 61 |
|              | C(17)-H(17B)...Cg(PTA)   | 3.2708(6) | 2.8207(41) | 145.099      | 4.0863(38) |    |
| Complex 5    | C13C-H13G...Cg(crown)    | 2.50      | 2.49       | 164          | 3.462(4)   | 78 |
|              | C16B-H16B...Cg(crown)    | 2.71      | 2.60       | 154          | 3.652(3)   | 65 |
|              | C18B-H18A...Cg(crown)    | 2.65      | 2.64       | 152          | 3.552(3)   | 59 |
|              | C19C-H19G...Cg(crown)    | 2.71      | 2.69       | 158          | 3.649(4)   | 63 |
|              | C24B-H24A...Cg(crown)    | 2.98      | 2.95       | 137          | 3.756(9)   | 43 |

|           |                                                 |      |      |     |           |    |
|-----------|-------------------------------------------------|------|------|-----|-----------|----|
|           | C <sub>24</sub> C-H <sub>24</sub> G...Cg(crown) | 2.85 | 2.83 | 151 | 3.739(5)  | 61 |
| Complex 6 | C <sub>3</sub> B-H <sub>3</sub> BA...Cg(PTA)    | 2.71 | 2.69 | 148 | 3.551(6)  | 64 |
|           | C <sub>11</sub> B-H <sub>11</sub> B...Cg(PTA)   | 2.88 | 2.86 | 141 | 3.664(8)  | 58 |
|           | C <sub>18</sub> A-H <sub>18</sub> B...Cg(crown) | 2.59 | 2.56 | 144 | 3.442(6)  | 57 |
|           | C <sub>18</sub> B-H <sub>18</sub> C...Cg(crown) | 2.76 | 2.70 | 142 | 3.592(7)  | 59 |
| Complex 7 | C <sub>5</sub> A-H <sub>5</sub> AA...Cg(crown)  | 2.96 | 2.61 | 150 | 3.809(8)  | 67 |
|           | C <sub>5</sub> B-H <sub>5</sub> BA...Cg(crown)  | 2.63 | 2.57 | 162 | 3.540(7)  | 68 |
|           | C <sub>11</sub> C-H <sub>11</sub> C...Cg(crown) | 2.96 | 2.67 | 154 | 3.839(10) | 57 |
|           | C <sub>23</sub> A-H <sub>23</sub> A...Cg(crown) | 2.86 | 2.75 | 156 | 3.782(6)  | 63 |

Table S10: the  $\pi \cdots \pi$  interactions for complexes 3, 5 and 7.

| $\pi \cdots \pi$ | Cg(I) | Res(I) Cg(J) | Cg-Cg      | Alpha    | Beta | Gamma | CgI_Perp    | CgJ_Perp    | Slippage |
|------------------|-------|--------------|------------|----------|------|-------|-------------|-------------|----------|
| complex 3        | Cg(1) | [1] -> Cg(1) | 4.1220(15) | 0        | 30.4 | 30.4  | -3.5567(10) | -3.5566(10) | 2.084    |
| Complex 5        | Cg(3) | [2] -> Cg(3) | 4.573(2)   | 0.02(19) | 37.1 | 37.1  | -3.6462(16) | -3.6462(16) | 2.760    |
| Complex 7        | Cg(5) | [3] -> Cg(5) | 4.492(3)   | 0.0(3)   | 43.9 | 43.9  | 3.239(2)    | 3.238(2)    | 3.113    |

Table S11: TGA and DSC for complex 2.

The TG and DSC analyses of complex 2 have been performed under nitrogen atmosphere with a heating rate of 10 °C min<sup>-1</sup>. The TGA measurement of 2 shows a weight loss of 0.60% in the temperature range 175-190°C, which corresponds to the loss of lattice water molecules (theoretical value of 0.56%). And the TGA measurement of 2 shows a weight loss of 0.13% in the temperature range 80-110°C, which corresponds to the loss of solvent on crystal surface.

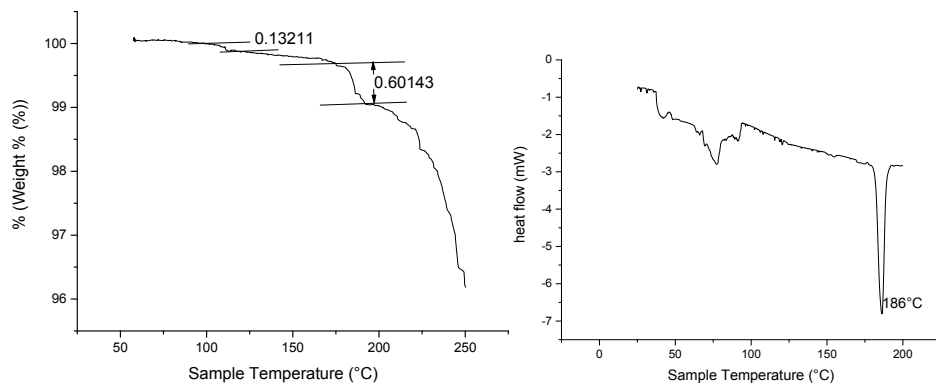

Table.s12: figure S1: FT-IR for compound **II** and complexes **1**, **2**, **3**, **4**. Figure S2: FT-IR for PTA and complexes **1**, **2**, **3**.

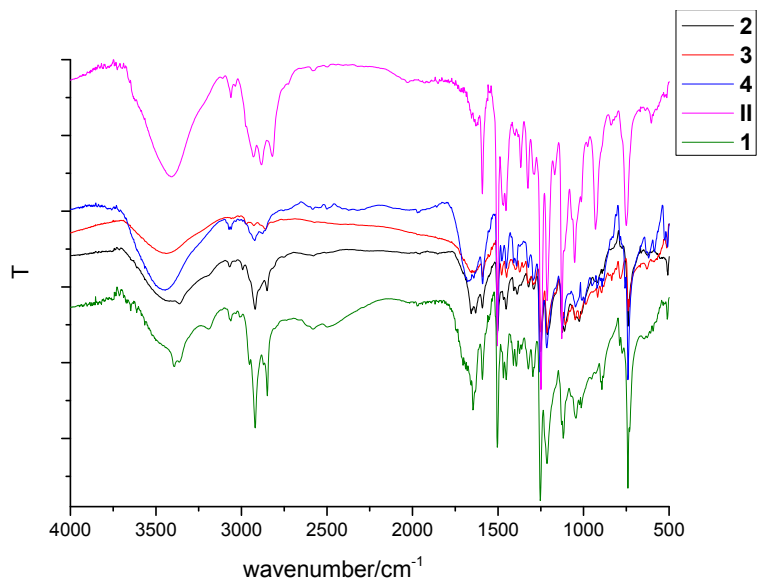

Figure s1

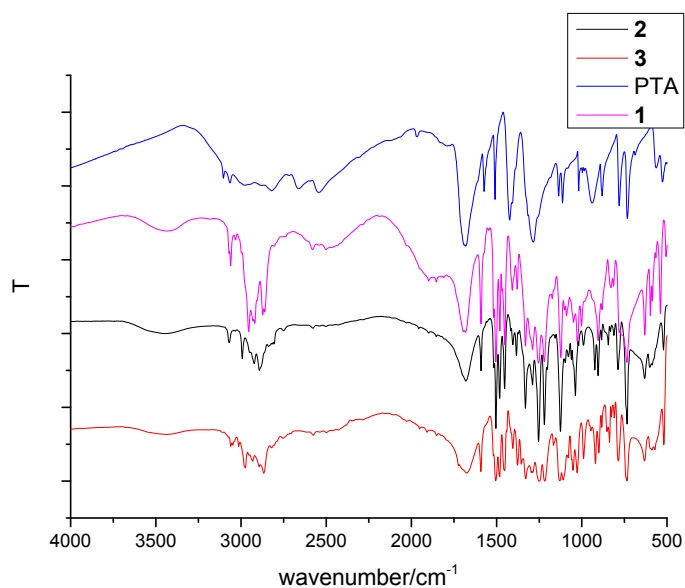

Figure s2
